# Supplementary material for: MRS2 and mitochondrial gene networks in endometrial cancer: mechanisms, biomarkers, and therapeutic implications
Source: PeerJ journal article supplement (doi:10.7717/peerj.20409), 2026-01-12
Supplement: Data_for_all_cell_experiments202509.zip [file CCK8-202509.xlsx]

## Sheet: Sheet 1
trt	8h	24h	48h
Control	0.42285	0.64355	1.70977
Control	0.64325	0.56605	1.80877
Control	0.47485	0.51435	1.41187
Control	0.39715	0.60005	1.41387
Control	0.58285	0.50805	1.51557
Control	0.53305	0.68555	1.42267
siMRS2-1	0.54325	0.43985	1.00887
siMRS2-1	0.66995	0.27305	1.38487
siMRS2-1	0.53675	0.38405	1.01907
siMRS2-1	0.51685	0.45645	1.20067
siMRS2-1	0.58285	0.27315	1.27647
siMRS2-1	0.43125	0.17705	1.18607
siMRS2-2	0.47225	0.35005	1.32177
siMRS2-2	0.75385	0.42445	1.23837
siMRS2-2	0.66285	0.31335	1.36567
siMRS2-2	0.51555	0.25205	1.50807
siMRS2-2	0.54415	0.56985	1.41607
siMRS2-2	0.44665	0.66505	1.07787
