# Supplementary material for: MRS2 and mitochondrial gene networks in endometrial cancer: mechanisms, biomarkers, and therapeutic implications
Source: PeerJ journal article supplement (doi:10.7717/peerj.20409), 2026-01-12
Supplement: Data_for_all_cell_experiments202509.zip [file Lactate-202509.xlsx]

## Sheet: Sheet1
	Lactate content (mmol/L)
siCtrl	1.26
siCtrl	1.242
siCtrl	1.274
siMRS2-1	1.545
siMRS2-1	1.236
siMRS2-1	1.251
siMRS2-2	1.5
siMRS2-2	1.378
siMRS2-2	1.425
