# Supplementary material for: MRS2 and mitochondrial gene networks in endometrial cancer: mechanisms, biomarkers, and therapeutic implications
Source: PeerJ journal article supplement (doi:10.7717/peerj.20409), 2026-01-12
Supplement: Data_for_cell_experiments.zip [file CCK8.xlsx]

## Sheet: Sheet 1
	8h	24h	48h
KLE	0.1345	0.282	1.2825
KLE	0.1303	0.4555	1.33
KLE	0.1107	0.3134	1.1889
KLE	0.1034	0.398	1.3893
KLE	0.1319	0.2475	1.1611
KLE+10ug/ml LPS	0.1245	0.3747	2.5908
KLE+10ug/ml LPS	0.1373	0.731	2.5776
KLE+10ug/ml LPS	0.1221	0.5849	2.8574
KLE+10ug/ml LPS	0.1189	0.3909	2.6188
KLE+10ug/ml LPS	0.1552	0.5246	2.416
