# Supplementary material for: MRS2 and mitochondrial gene networks in endometrial cancer: mechanisms, biomarkers, and therapeutic implications
Source: PeerJ journal article supplement (doi:10.7717/peerj.20409), 2026-01-12
Supplement: Data_for_cell_experiments.zip [file Lactate.xlsx]

## Sheet: Sheet 1
	8h	24h	48h
KLE	1.51	1.8	2.2
KLE	1.503	1.71	2.1
KLE	1.533	1.69	1.9
KLE	1.505	1.73333	2.06667
KLE+10ug/ml LPS	1.4	1.9	2.7
KLE+10ug/ml LPS	1.55	1.8	2.7
KLE+10ug/ml LPS	1.5	1.8	2.6
KLE+10ug/ml LPS	1.46667	1.83333	2.66667
